# Supplementary material
Source: Springer Nature journal article supplement (https://www.springermedizin.de/resource/supplementary/13019_2013_1427_MOESM6_ESM.pdf/9640642)
Supplement: MOESM6 [file 9640642]

| Model  | Study name  | Statistics for each study |             |             |         |         | Odds ratio and 95% CI |      |      |      |      |      |       |
|--------|-------------|---------------------------|-------------|-------------|---------|---------|-----------------------|------|------|------|------|------|-------|
|        |             | Odds ratio                | Lower limit | Upper limit | Z-Value | p-Value | 0.10                  | 0.20 | 0.50 | 1.00 | 2.00 | 5.00 | 10.00 |
|        | zhuyanbin   | 0.733                     | 0.247       | 2.175       | -0.559  | 0.576   |                       |      |      |      |      |      |       |
|        | Yixianhua   | 0.396                     | 0.260       | 0.604       | -4.300  | 0.000   |                       |      |      |      |      |      |       |
|        | valenti     | 2.921                     | 0.150       | 56.913      | 0.707   | 0.479   |                       |      |      |      |      |      |       |
|        | olivari     | 0.188                     | 0.031       | 1.143       | -1.815  | 0.070   |                       |      |      |      |      |      |       |
|        | hoye        | 0.576                     | 0.385       | 0.863       | -2.675  | 0.007   |                       |      |      |      |      |      |       |
|        | drozd       | 1.343                     | 0.414       | 4.356       | 0.491   | 0.624   |                       |      |      |      |      |      |       |
|        | chenshaolia | 0.177                     | 0.036       | 0.860       | -2.147  | 0.032   |                       |      |      |      |      |      |       |
|        | angioi      | 1.019                     | 0.468       | 2.218       | 0.047   | 0.962   |                       |      |      |      |      |      |       |
| Fixed  |             | 0.542                     | 0.421       | 0.697       | -4.775  | 0.000   |                       |      |      |      |      |      |       |
| Random |             | 0.578                     | 0.387       | 0.864       | -2.671  | 0.008   |                       |      |      |      |      |      |       |
